# Supplementary material for: Nanostructured 2D MoS2 honeycomb and hierarchical 3D CdMoS4 marigold nanoflowers for hydrogen production under solar light
Source: Royal Society of Chemistry journal article supplement (doi:10.1039/c5ta04617c), 2015-01-01
Supplement: c5ta04617c1.pdf [file c5ta04617c1.pdf]

## Electronic Supplementary Information (ESI)

# Nanostructured 2D MoS<sub>2</sub> Honeycomb and Hierarchical 3D Marigold Nanoflower of CdMoS<sub>4</sub> for Hydrogen Production Under Solar Light

*Sunil R. Kadam<sup>a</sup>, Dattatray J. Late<sup>b</sup>, Rajendra P. Panmand<sup>a</sup>, Milind V. Kulkarni<sup>a</sup>, Latesh K.*

*Nikam<sup>a</sup>, Suresh W. Gosavi<sup>c</sup>, Chan-Jin Park<sup>d\*</sup>, Bharat B. Kale<sup>\*,a,d</sup>*

*<sup>a</sup>Centre for Materials for Electronics Technology (C-MET), Department of Electronics and Information and Technology (DeitY), Government of India, Panchawati off Pashan road, Pune – 411008, India*

*<sup>b</sup>Physical & Materials Chemistry Division, CSIR-National Chemical Laboratory, Dr. HomiBhabha Road, Pune 411008, Maharashtra, India*

*<sup>c</sup>Department of Physics, University of Pune -411007, India.*

*<sup>d</sup>Material Science & Engineering Department, Chonnam National University, Gwangju 500 757, South Korea*

\*Corresponding author: [kbbb1@yahoo.com](mailto:kbbb1@yahoo.com), [parkcj@chonnam.ac.kr](mailto:parkcj@chonnam.ac.kr)

## ESI: S-1

**Figure S1:**

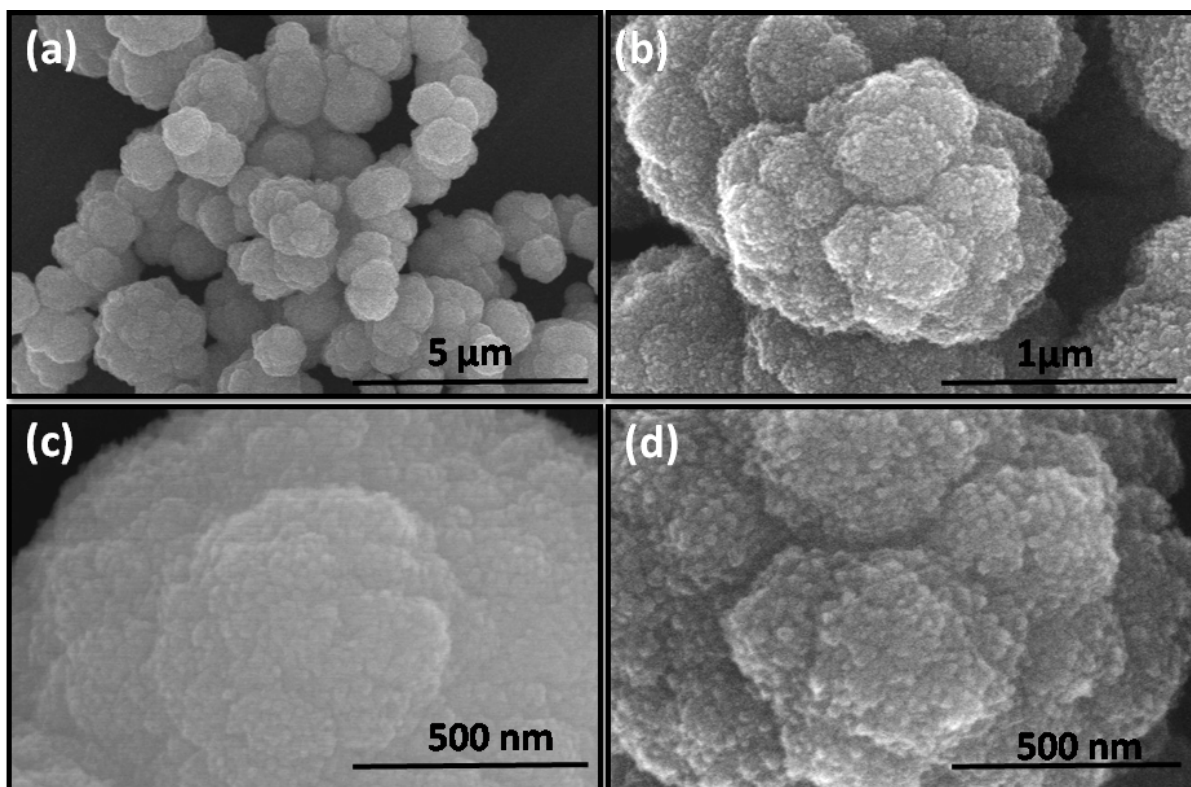

**Figure S-1(a-d)** FESEM images of as prepared CdS.

## ESI: S-2

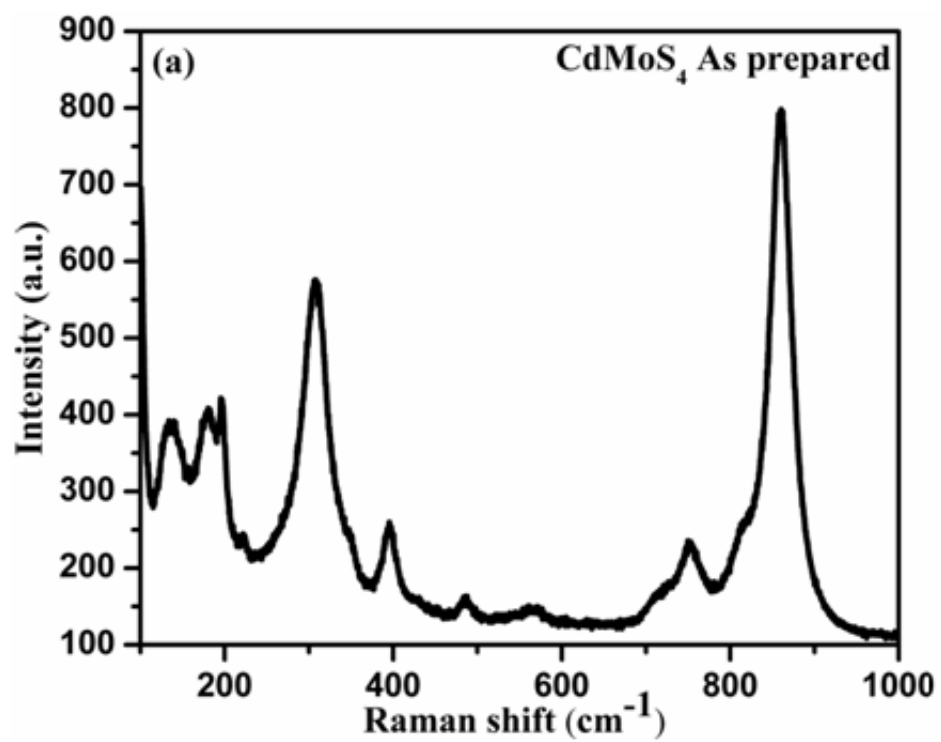

Figure S-1: Raman of as prepared  $\text{CdMoS}_4$  sample.

## ESI: S-3

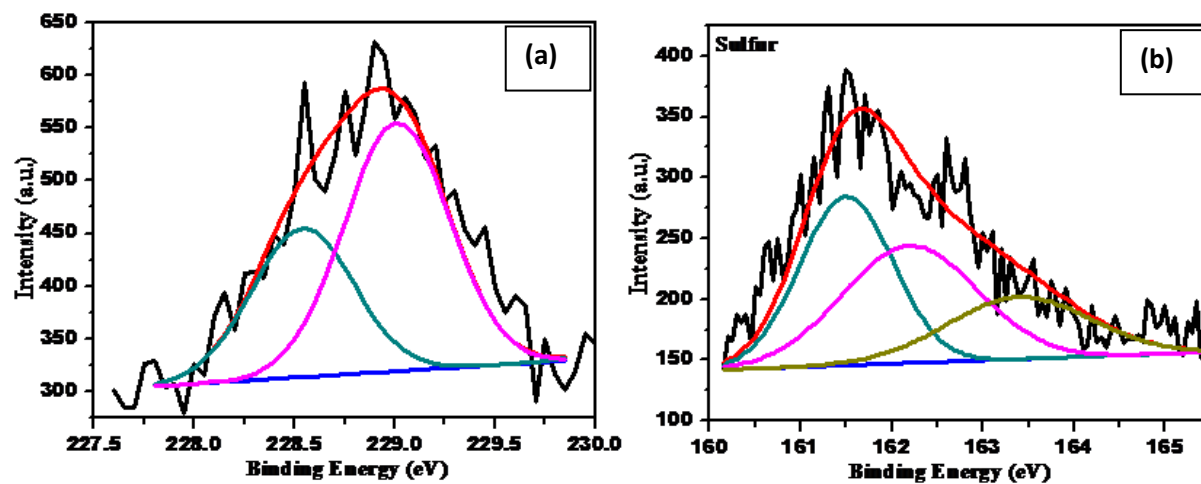

Figure S-1: Deconvoluted peak by fitting (a) Mo and (b) S2P XPS spectra of CdMoS<sub>4</sub> annealed at 400 °C sample.

## Table S1:

**Table S1:** XPS of annealed CdMoS<sub>4</sub> sample.

| <i>Sample</i>                              | <i>Element</i>    |                        | <i>Binding energy (eV)</i>    | <i>Area (a.u.)</i> |
|--------------------------------------------|-------------------|------------------------|-------------------------------|--------------------|
| <i>CdMo<sub>x</sub>S<sub>x</sub>400 °C</i> | <i>Mo</i>         |                        | <i>3d<sub>5/2</sub>228.8</i>  | <i>441.3</i>       |
|                                            |                   |                        | <i>3d<sub>3/2</sub> 232.1</i> | <i>300.8</i>       |
|                                            | <i>Mo Deconv.</i> | <i>Mo<sup>4+</sup></i> | <i>228.5</i>                  | <i>149.7</i>       |
|                                            |                   | <i>Mo<sup>6+</sup></i> | <i>229.2</i>                  | <i>259.4</i>       |
|                                            | <i>Cd</i>         |                        | <i>3d<sub>3/2</sub> 411.7</i> | <i>700.1</i>       |
|                                            |                   |                        | <i>3d<sub>5/2</sub>404.9</i>  | <i>824.6</i>       |
|                                            | <i>Sulfur 2P</i>  | <i>CdS</i>             | <i>161.5</i>                  | <i>74.1</i>        |
|                                            |                   | <i>MoS2</i>            | <i>162.2</i>                  | <i>149.9</i>       |
|                                            |                   | <i>MoS3</i>            | <i>163.4</i>                  | <i>240.5</i>       |

## ESI: S-4

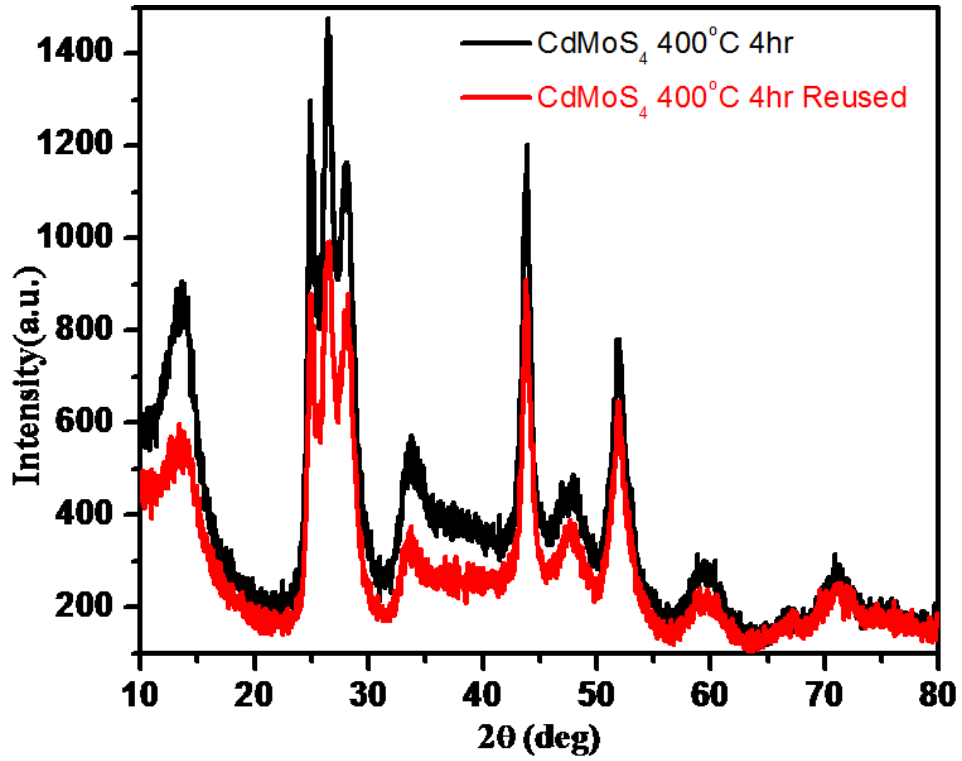

Figure S-1: XRD of CdMoS<sub>4</sub> 400 °C 4hr and reused sample.

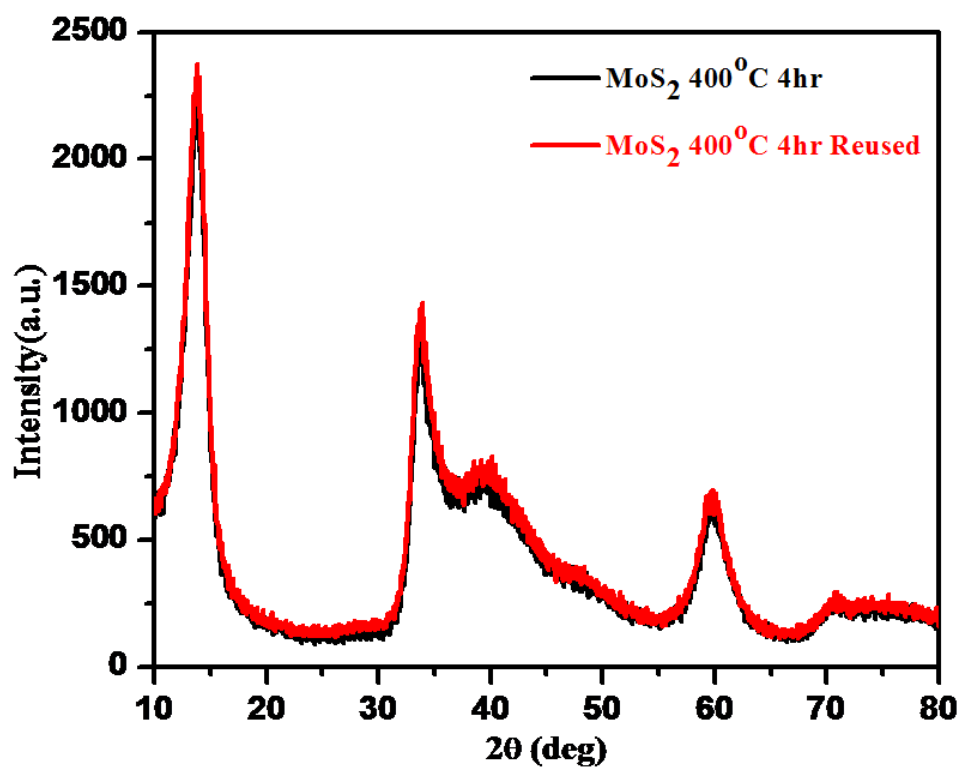

Figure S-2: XRD of MoS<sub>2</sub> 400 °C 4 hr and reused sample.

## ESI: S-5

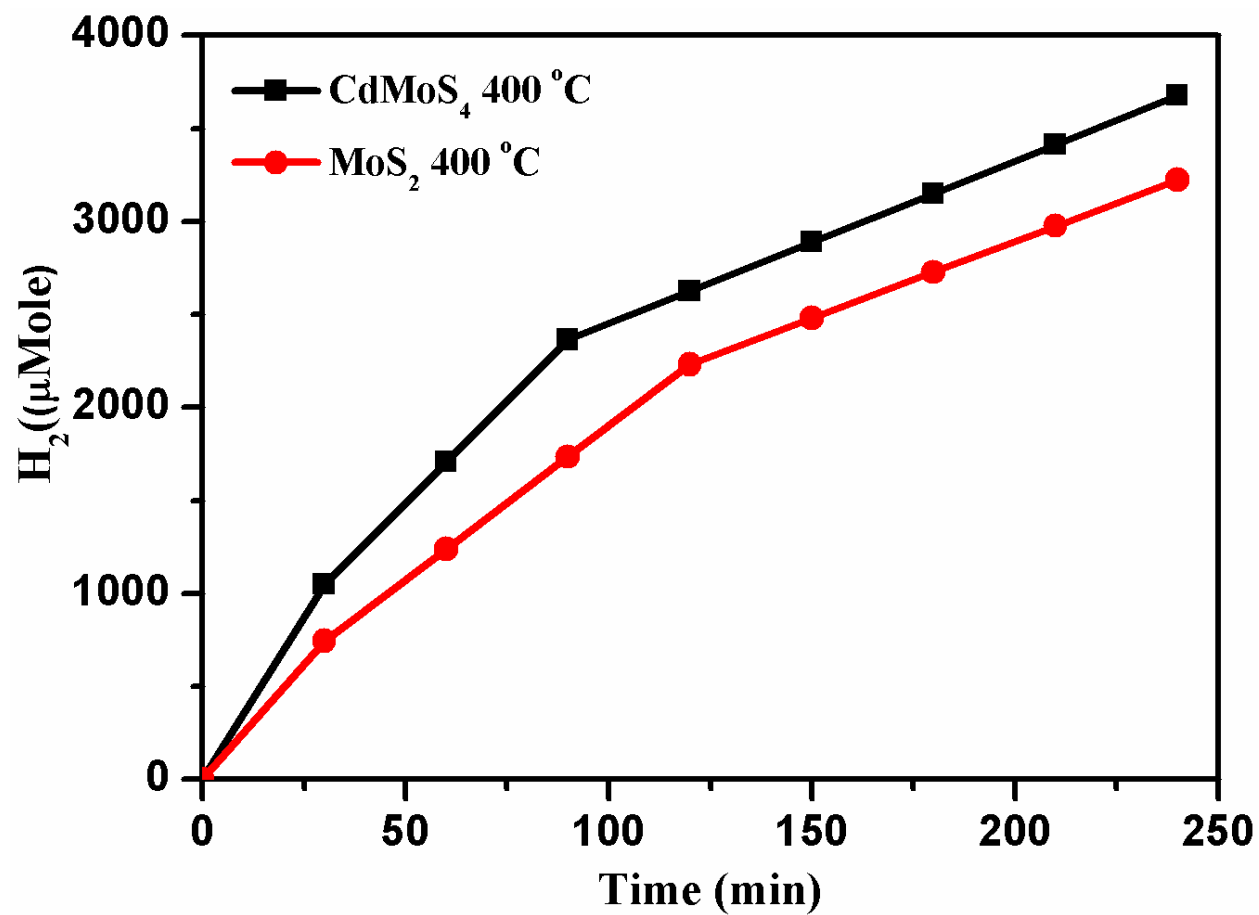

**Figure S-1:** Photocatalytic H<sub>2</sub> generation from water without existence of sacrificial reagent (methanol) using CdMoS<sub>4</sub> 400 °C and MoS<sub>2</sub> 400 °C.
